# Supplementary material
Source: PubMed Central journal article supplement (PMC5263107)
Supplement: NIHMS831584-supplement-Supp_Data.pdf [file NIHMS831584-supplement-Supp_Data.pdf]

**PrgU: A Suppressor of Sex Pheromone Toxicity in *Enterococcus faecalis***

Mিনny Bhatt<sup>1</sup>, Martha I. Camacho<sup>1</sup>, Christian Gonzalez-Rivera<sup>1</sup>, Kristi L. Frank<sup>2#</sup>, Jennifer L. Dale<sup>2</sup>, Dawn A. Manias<sup>2</sup>, Gary M. Dunny<sup>2</sup>, and Peter J. Christie<sup>1\*</sup>

**Running Title: PrgU suppression of PrgB toxicity in *E. faecalis***

Keywords: Gram-positive cell surface adhesins, cell death, PUA domain, sex pheromone, *Enterococcus*, gene regulation

<sup>1</sup>Department of Microbiology and Molecular Genetics, McGovern Medical School, 6431 Fannin St, Houston, Texas 77030; <sup>2</sup>Department of Microbiology and Immunology, University of Minnesota Medical School, Microbiology Research Facility, 689 23<sup>rd</sup> Ave, S.E., Minneapolis, Minnesota 55455

<sup>#</sup>Present address: Department of Microbiology and Immunology, Uniformed Services University of the Health Sciences, 4301 Jones Bridge Road, Bethesda, MD 20814

\*Correspondence to: Peter J. Christie

Department of Microbiology and Molecular Genetics, McGovern Medical School, Houston, TX 77005.

Phone: 713-500-5440, Fax: 713-500-5499

E-mail: [Peter.J.Christie@uth.tmc.edu](mailto:Peter.J.Christie@uth.tmc.edu)

**TABLE S1. Bacterial strains used in this study.**

| Strains or plasmids | Relevant features                                                                                                                                                               | Source or Reference                 |
|---------------------|---------------------------------------------------------------------------------------------------------------------------------------------------------------------------------|-------------------------------------|
| <b>Strains</b>      |                                                                                                                                                                                 |                                     |
| <i>E. coli</i>      |                                                                                                                                                                                 |                                     |
| DH5 $\alpha$        | F- $\phi$ 80 <i>lacZ</i> $\Delta$ M15 $\Delta$ ( <i>lacZYA-argF</i> )U169 <i>deoR recA1 endA1 hsdR17(rK-mK<sup>+</sup>) phoA supE44<math>\lambda</math>- thi-1 gyrA96 relA1</i> | Gibco-BRL                           |
| BL21 (DE3)          | F <sup>-</sup> ompT r <sub>b</sub> <sup>-</sup> m <sub>b</sub> <sup>-</sup> DE3                                                                                                 | Novagen                             |
| EC1000              | <i>E. coli</i> cloning host, provides RepA in <i>trans</i>                                                                                                                      | (Leenhouts <i>et al.</i> , 1996)    |
| <i>E. faecalis</i>  |                                                                                                                                                                                 |                                     |
| OG1RF               | Rif <sup>r</sup> Fus <sup>r</sup>                                                                                                                                               | (Dunny <i>et al.</i> , 1978)        |
| OG1ES               | Ery <sup>r</sup> Str <sup>r</sup>                                                                                                                                               | (Staddon <i>et al.</i> , 2006)      |
| TX5537              | Rif <sup>r</sup> Fus <sup>r</sup> , OG1RF deleted of <i>srtA</i> and <i>bps</i>                                                                                                 | (Nallapareddy <i>et al.</i> , 2006) |

**TABLE S2. Plasmids used in this study.**

| <b>Plasmids</b>               |                                                                                                                    |                                 |
|-------------------------------|--------------------------------------------------------------------------------------------------------------------|---------------------------------|
| pCJK47                        | Spc <sup>r</sup> , carries <i>oriT</i> <sub>pCF10</sub> , <i>lacZ</i> , and P-pheS* cassette                       | (Kristich <i>et al.</i> , 2007) |
| pDL278p23                     | Spc <sup>r</sup> , pDL278 with <i>L. lactis</i> constitutive promoter P <sub>23</sub>                              | (Chen <i>et al.</i> , 2007)     |
| pCI372                        | Chl <sup>r</sup> , <i>E. coli</i> - <i>E. faecalis</i> shuttle vector                                              | (Hayes <i>et al.</i> , 1990)    |
| pCF10                         | Tet <sup>r</sup> , pheromone inducible conjugative plasmid                                                         | (Dunny <i>et al.</i> , 1981)    |
| pCJK205                       | Erm <sup>r</sup> , plasmid constitutively expressing <i>lacZ</i>                                                   | (Djoric & Kristich, 2015)       |
| pCF10 $\Delta$ <i>prgU</i>    | Tet <sup>r</sup> , pCF10 deleted of <i>prgU</i>                                                                    | This study                      |
| p10-mini                      | Chl <sup>r</sup> , pCI372 carrying the entire <i>prgQ</i> regulatory region and the <i>prgA-prgC</i> gene cassette | This study                      |
| p10-mini $\Delta$ <i>prgU</i> | Chl <sup>r</sup> , p10-mini deleted of <i>prgU</i>                                                                 | This study                      |
| pMCM3                         | Spc <sup>r</sup> , pCJK47 with <i>prgU</i> flanking regions for construction of pCF10 $\Delta$ <i>prgU</i>         | This study                      |
| pMB11                         | Spc <sup>r</sup> , pDL278p23 expressing P <sub>23</sub> :: <i>prgU</i>                                             | This study                      |
| pMC001                        | Spc <sup>r</sup> , pDL278p23 expressing P <sub>23</sub> :: <i>prgA</i>                                             | This study                      |
| pMC002                        | Spc <sup>r</sup> , pDL278p23 expressing P <sub>23</sub> :: <i>prgB</i>                                             | This study                      |
| pMB4                          | Spc <sup>r</sup> , pDL278p23 expressing P <sub>23</sub> :: <i>prgC</i>                                             | This study                      |
| pMC003                        | Spc <sup>r</sup> , pDL278p23 expressing P <sub>23</sub> :: <i>prgR,prgS</i>                                        | This study                      |

**TABLE S3. Oligonucleotides used in this study.**

| <b>Primers</b>         | <b>Sequence (5' to 3')</b>                          | <b>Used for:</b>                  |
|------------------------|-----------------------------------------------------|-----------------------------------|
| F- prgU up-XbaI        | gctctagaggacaatggctctgtgttgc                        | pMCM3                             |
| R- prgU up-XmaI        | taattttcccgggttttcccctccataactaa                    | pMCM3                             |
| F- prgU down-XmaI      | gggaaaaacccggaaaaattattggaggaaattac                 | pMCM3                             |
| R- prgU down-NcoI      | catgccatggcctccgctaagttgctgtt                       | pMCM3                             |
| F-RBS prgU-BamHI       | cgcgggatccttaaggaggtattatctcgagatggaagcagtagtagcaga | pMB11                             |
| R-prgU- SphI           | ccgcgcatgcttatgattttaaagtctgc                       | pMB11                             |
| F-prgU down 5'phos     | ataaaaaattatttggaggaaattacaatg                      | p10mini $\Delta$ prgU             |
| R-prgU up 5'phos       | tttcccctccataactaaaaaagaag                          | p10mini $\Delta$ prgU             |
| F-prgA-BamHI           | cgcggatccttaaggaggtattatatgaaaaagattgcaagt          | pMC001                            |
| R-prgA-SphI            | acatgcatgcttaactattttttacg                          | pMC001                            |
| F-prgB-BamHI           | cgcggatccttaaggaggtattatatgaatcaacagactgaag         | pMC002                            |
| R-prgB-SphI            | acatgcatgcttattttgtttctttctacg                      | pMC002                            |
| F-prgC-BamHI           | cgcggatccttaaggaggtattatatgaaaaaattattttatcaagc     | pMB4                              |
| R-prgC-SphI            | acatgcatgcttaagctttttcttattc                        | pMB4                              |
| F-prgRS-BamHI          | cgcggatccttaaggaggtattatatgattgaactgaaagcaactg      | pMC003                            |
| R-prgRS-SphI           | acatgcatgctcacgtaccgccttgttctg                      | pMC003                            |
| <b>qRT-PCR Primers</b> | <b>Sequence (5' to 3')</b>                          | <b>Source or Reference</b>        |
| gyrB forward           | caagccaaaacaggtcgcc                                 | (Bourgogne <i>et al.</i> , 2007)  |
| gyrB reverse           | accaacaccgtgcaagcc                                  | (Bourgogne <i>et al.</i> , 2007)  |
| QL forward             | catgtatatgttccccgctttt                              | (Chatterjee <i>et al.</i> , 2013) |
| QL reverse             | cggctcttacgagtagttcca                               | (Chatterjee <i>et al.</i> , 2013) |
| prgA-F RT              | agtcaacaagcagtgactgacc                              | This study                        |
| prgA-R RT              | aacagcctgtgtatccgtagc                               | This study                        |
| prgB-F RT              | cgacagcggtttctttcttc                                | (Chatterjee <i>et al.</i> , 2013) |
| prgB-R RT              | ggtctttggcagaaatcgtc                                | (Chatterjee <i>et al.</i> , 2013) |
| prgC-F RT              | cctgaacagcccactaaacc                                | This study                        |
| prgC-R RT              | gtgttacctccgctaagttgc                               | This study                        |

|           |                       |                                   |
|-----------|-----------------------|-----------------------------------|
| prgJ-F RT | acccaatgactggcttagag  | (Bhatty <i>et al.</i> , 2015)     |
| prgJ-R RT | tagacgtagccctgatacgg  | (Bhatty <i>et al.</i> , 2015)     |
| pcfC-F RT | gcgcttattggaggagacgag | (Chatterjee <i>et al.</i> , 2013) |
| pcfC-R RT | cggcgccacgtataccac    | (Chatterjee <i>et al.</i> , 2013) |

### SUPPLEMENTARY FIGURE LEGENDS

**FIG. S1.** Pheromone induction results in enhanced *prgQ* transcript levels in a  $\Delta prgU$  mutant. qRT-PCR results showing the relative expression levels of regions of the *prgQ* operon in OG1RF strains carrying pCF10, pCF10 $\Delta prgU$ , and the  $\Delta U$ -Res *R1* variant at 30 and 60 min following cCF10 pheromone induction with 5 ng ml<sup>-1</sup> cCF10. The data shown are from one biological replicate, which was repeated with similar results.

**FIG. S2.** The  $\Delta prgU$  mutant, but not other  $\Delta prg/pcf$  mutant strains displays pheromone sensitive growth. A) OG1RF strains carrying pCF10 or pCF10 variants deleted of the genes shown were assayed for growth in the presence of pheromone. Overnight cultures were diluted 1:100 in fresh BHI and incubated for 1 h at 37°C in the absence of pheromone. Cultures were spread on BHI media, allowed to dry, and cCF10 pheromone (10 ng ml<sup>-1</sup>) was added to the center of the plate. Plates were incubated overnight at 37°C and assessed for growth. cCF10 pheromone is solubilized in DMSO, which inhibits *E. faecalis* growth and causes small zones of clearance independently of cCF10-induced toxicity. B) Pheromone spot assays showing that the  $\Delta prgU$  mutant is growth inhibited only when exposed to pheromone at an early log phase of growth.

**FIG. S3.**  $\Delta U$ -Res mutations suppress production of PrgB and PrgC adhesins and accumulate mutations in the *prgQ* regulatory region. A) Representative pheromone spot assays showing pheromone sensitivity of the  $\Delta prgU$  mutant, OG1RF(pCF10 $\Delta prgU$ ), and pheromone resistance of a  $\Delta U$ -Res mutant strain isolated from within the zone of pheromone inhibition. B) Steady-state levels of Prg proteins in 10  $\Delta U$ -Res variants induced for 1 h with cCF10 pheromone (10 ng ml<sup>-1</sup>). Strains: OG1RF with pCF10 (WT plasmid),  $\Delta prgU$  (pCF10 $\Delta prgU$ ), or  $\Delta U$ -Res variants *R1*-*R10*. Immunoblots were developed with antibodies to the Prg proteins shown or to RNA polymerase  $\beta$  subunit as a loading control. MW, Molecular weights of proteins in kDa are indicated. Protein extracts were loaded on a per-cell equivalent basis. C) Upper: Schematic of the *prgQ* regulatory region showing the locations of the P<sub>Q</sub> and P<sub>X</sub> promoters, inverted repeats IRS1 and IRS2 predicted to form stem-loop transcription terminators, and the putative regulatory genes *prgR* and *prgS*. Numbers refer to distances (in base pairs) from the P<sub>Q</sub> promoter start-site. Below: Positions of mutations identified in the 10  $\Delta U$ -Res variants. Symbols: open triangles, single base-pair (bp) deletion mutations; inverted filled triangles, single bp insertion mutations. Right: Transfer frequencies of the  $\Delta U$ -Res variant plasmids in 2 h filter matings presented as the number of transconjugants per donor cell (Tcs/D). Transfer frequencies of donors harboring WT pCF10 and pCF10 $\Delta prgU$  are shown for comparison. Experiments were repeated at least three times in duplicate, and results from a representative experiment are shown.

**FIG. S4.** Growth defect of OG1RF(pCF10 $\Delta prgU$ ) in the presence of bile salts. Overnight cultures were diluted into fresh BHI medium and cultured to an OD<sub>600</sub> of ~0.1. Tenfold serial dilutions were plated on BHI medium with or without cCF10 pheromone (2 ng ml<sup>-1</sup>), or these media additionally containing 4 % sodium cholate or 0.06 % sodium deoxycholate. Strains: OG1RF harboring pCF10 or  $\Delta prgU$  (pCF10 $\Delta prgU$ ) alone or together with the P<sub>23</sub>::*prgU* expression plasmid (P<sub>23</sub>::U, pMB11).

**FIG. S5.** Deletion of *prgU* from a miniaturized pCF10 plasmid confers enhanced production of the Prg surface adhesins and pheromone toxicity. A) Steady-state levels of Prg/Pcf proteins in strains induced for 1 h

with cCF10 pheromone (10 ng ml<sup>-1</sup>). Strains: OG1RF with **pCF10** (WT plasmid); **ΔprgU** (pCF10ΔprgU), **p10-mini** (encodes the *prgQ* regulatory region and the *prgA-C* gene cassette; see Fig. 1A), and **p10-miniΔprgU** alone (-) or with the P<sub>23</sub>::*prgU* expression plasmid (**P<sub>23</sub>:U**; pMB11). Immunoblots were developed with antibodies to the Prg/Pcf proteins shown or to RNA polymerase β subunit as a loading control. Protein sizes (in kilodaltons, kDa) are listed at the right. Protein extracts were loaded on a per-cell equivalent basis. **B**) Pheromone spot assay. OG1RF carrying p10-miniΔprgU is inhibited by pheromone; P<sub>23</sub>::*prgU* expression *in trans* restores pheromone insensitive growth. **C**) Pheromone-mediated antibiotic sensitivity of OG1RF(p10-miniΔprgU). Strains: OG1RF with p10-mini alone or with the P<sub>23</sub>::*prgU* expression plasmid (**P<sub>23</sub>:U**; pMB11). Strains were inoculated from glycerol stocks into BHI lacking (-) or containing (+) cCF10 and in the absence (**No AB**) or presence of the antibiotics at final concentrations listed (in μg ml<sup>-1</sup>). Cultures were incubated overnight at 37 °C without shaking and culture densities (OD<sub>600</sub>) were measured. **D**) PrgB overproduction confers severe growth defects. Freshly transformed cells were inoculated in fresh BHI supplemented with pheromone (10 ng ml<sup>-1</sup>) and incubated without shaking for 1 h at 37°C. Cells were processed for imaging as described in the Experimental procedures. Strains: OG1RF with p10-mini alone or with the P<sub>23</sub>::*prgU* expression plasmid (**P<sub>23</sub>:U**; pMB11), or with p10-miniΔprgU.

**FIG. S6.** PrgB overproduction confers pheromone toxicity. **A**) Plasmid curing assay. Colonies from transformation plates were inoculated into antibiotic-free BHI and incubated without shaking overnight at 37°C. Overnight cultures were then serially diluted and spotted onto BHI agar plates containing or lacking spectinomycin (500 μg ml<sup>-1</sup>) to which the P<sub>23</sub> plasmid confers resistance. **B**) Levels of Prg proteins in the ΔprgA-C mutants engineered to express *prgA*, *prgB* or *prgC* from the P<sub>23</sub> promote, as monitored by immunostaining with antibodies to PrgA, PrgB, or PrgC. Protein extracts were loaded on a per-cell equivalent basis and RNA polymerase β subunit as a loading control. **C**) PrgB overproduction confers severe growth defects. Freshly transformed cells were inoculated in fresh BHI supplemented with pheromone (10 ng ml<sup>-1</sup>) and incubated without shaking for 1 h at 37°C. Cells were processed for imaging as described in the Experimental procedures. Strains analyzed: OG1RF carrying pCF10 or pCF10ΔprgA-C alone or with the P<sub>23</sub>::*prgA*, P<sub>23</sub>::*prgB*, or P<sub>23</sub>::*prgC* expression plasmids. **D**) Pheromone spot assay showing OG1RF harboring the pCF10ΔprgA-C mutant plasmid (**ΔprgA-C**) exhibit pheromone-insensitive growth, while production of PrgB restores pheromone-mediated growth suppression. Strains: OG1RF(ΔprgA-C) carrying the P<sub>23</sub> vector plasmid (pDL278P<sub>23</sub>), P<sub>23</sub>::*prgA* (pMC001), P<sub>23</sub>::*prgB* (pMC002), or p<sub>23</sub>::*prgC* (pMB4).

**FIG. S7.** PrgU Structure. **A**) An X-ray structure of a PrgU (V583; EF0046) tetramer. **B**) Ribbon representation of a PrgU monomer, determined by Phyre2 modeling. **C, D**) Ribbon representation and topology diagram of the PUA domain from archaeosine tRNA-guanine transglycosylase (ArcTGT) of *P. horikoshii* (Protein Data Bank code 1J2B) (reprinted with permission from (Perez-Arellano *et al.*, 2007).

**FIG. S8.** Phylogenetic distributions and genetic linkages of *prgU* and *prgB*-like surface adhesins. *prgU* genes are distributed among *E. faecalis* and other enterococcal species, as well as *Staphylococcus aureus*, invariably linked to *prgB*-like genes and genes encoding other surface adhesins or cell wall modifying proteins. In *E. faecalis* and *S. agalactiae* species, *prgU* genes are linked to *prgB* genes that encode conserved GbpC (Glucan-binding protein C) and isopep\_sspB\_C2 (adhesin isopeptide-forming domain, sspB-C2 type) domains. In *E. faecium*, *E. raffinosus*, and *S. aureus* species, *prgU* genes are instead linked to genes (provisionally designated “prgB-like”) that encode adhesins with Cna-B peptidase (Cna protein B-type) domains. Species/strain/plasmid names with genome and *prgU* accession numbers in parantheses: pCF10 (NC\_006827.2, pCF10-17); V583 PAI (NC\_004668.1, EF0486), pTEF1 (NC\_004669.1, EFA0046); pTEF2 (NC\_004671.1; unannotated), pEF62pC (CP002494.1, EF62\_RS15500); strain 19 (JTKW01000029.1, KII47007.1); EnGen0418 (JAHX01000008.1, ETU39552.1); *S. agalactiae* DK-PW-092 (LBKE01000032.1, KLL26985.1); *Enterococcus faecium* VRE0576 (JAAK01000014.1, EZP99904.1); *Enterococcus raffinosus* ATCC 49464 (AJAL01000017.1, EOH75571.1); *Staphylococcus aureus* VRS11b (AHBV01000001.1, EIK36346.1).

## REFERENCES

- Bourgogne, A., Singh, K.V., Fox, K.A., Pflughoft, K.J., Murray, B.E., and Garsin, D.A. (2007) EbpR is important for biofilm formation by activating expression of the endocarditis and biofilm-associated pilus operon (ebpABC) of *Enterococcus faecalis* OG1RF. *J Bacteriol* **189**: 6490-6493.
- Chatterjee, A., Cook, L.C., Shu, C.C., Chen, Y., Manias, D.A., Ramkrishna, D. *et al.* (2013) Antagonistic self-sensing and mate-sensing signaling controls antibiotic-resistance transfer. *Proc Natl Acad Sci U S A* **110**: 7086-7090.
- Chen, Y., Staddon, J.H., & Dunny, G.M. (2007) Specificity determinants of conjugative DNA processing in the *Enterococcus faecalis* plasmid pCF10 and the *Lactococcus lactis* plasmid pRS01. *Mol Microbiol* **63**: 1549-1564.
- Djoric, D., and Kristich, C.J. (2015) Oxidative stress enhances cephalosporin resistance of *Enterococcus faecalis* through activation of a two-component signaling system. *Antimicrob Agents Chemother* **59**: 159-169.
- Dunny, G., Funk, C. and Adsit, J. (1981) Direct stimulation of the transfer of antibiotic resistance by sex pheromones in *Streptococcus faecalis*. *Plasmid* **6**: 270-278.
- Dunny, G.M., Brown, B.L. and Clewell, D.B. (1978) Induced cell aggregation and mating in *Streptococcus faecalis*: evidence for a bacterial sex pheromone. *Proc Natl Acad Sci U S A* **75**: 3479-3483.
- Hayes, F., Daly C., and Fitzgerald, G.F. (1990) Identification of the minimal replicon of *Lactococcus lactis subsp. lactis* UC317 plasmid pCI305. *Appl Environ Microbiol* **56**: 202-209.
- Kristich, C.J., Chandler, J.R. and Dunny, G.M. (2007) Development of a host-genotype-independent counterselectable marker and a high-frequency conjugative delivery system and their use in genetic analysis of *Enterococcus faecalis*. *Plasmid* **57**: 131-144.
- Leenhouts, K., Buist, G., Bolhuis, A., ten Berge, A., Kiel, J., Mierau, I., *et al.* (1996) A general system for generating unlabelled gene replacements in bacterial chromosomes. *Mol Gen Genet* **253**: 217-224.
- Nallapareddy, S.R., Singh, K.V., Sillanpaa, J., Garsin, D.A., Hook, M., Erlandsen, S.L., and Murray, B.E. (2006) Endocarditis and biofilm-associated pili of *Enterococcus faecalis*. *J Clin Invest* **116**: 2799-2807.
- Perez-Arellano, I., Gallego, J., and Cervera, J. (2007) The PUA domain - a structural and functional overview. *FEBS J* **274**: 4972-4984.
- Staddon, J.H., Bryan, E.M., Manias, D.A., Chen, Y., and Dunny, G.M. (2006) Genetic characterization of the conjugative DNA processing system of enterococcal plasmid pCF10. *Plasmid* **56**: 102-111.

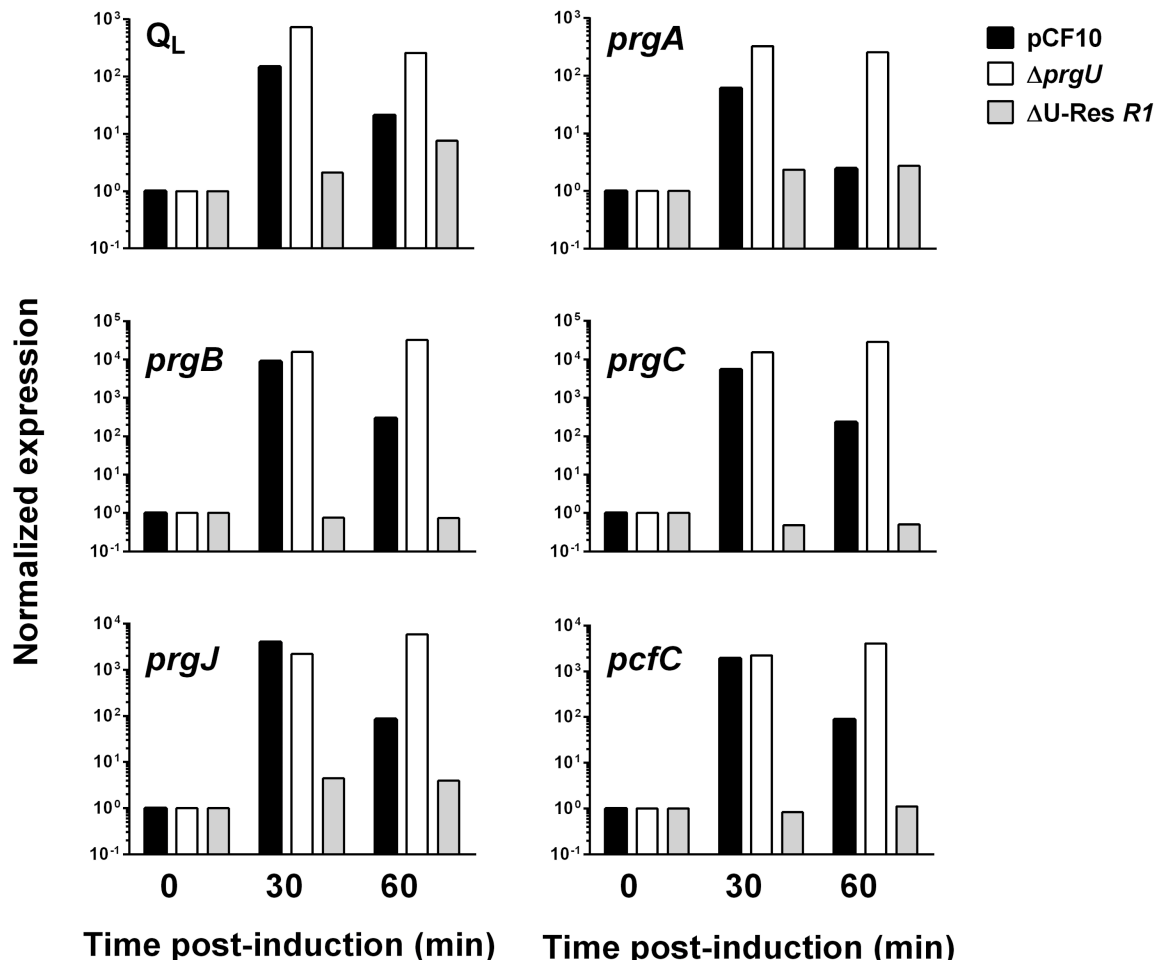

**FIG. S1.** Pheromone induction results in enhanced *prgQ* transcript levels in a  $\Delta prgU$  mutant. qRT-PCR results showing the relative expression levels of regions of the *prgQ* operon in OG1RF strains carrying pCF10, pCF10 $\Delta prgU$ , and the  $\Delta U$ -Res *R1* variant at 30 and 60 min following cCF10 pheromone induction with 5 ng ml<sup>-1</sup> cCF10. The data shown are from one biological replicate, which was repeated with similar results.

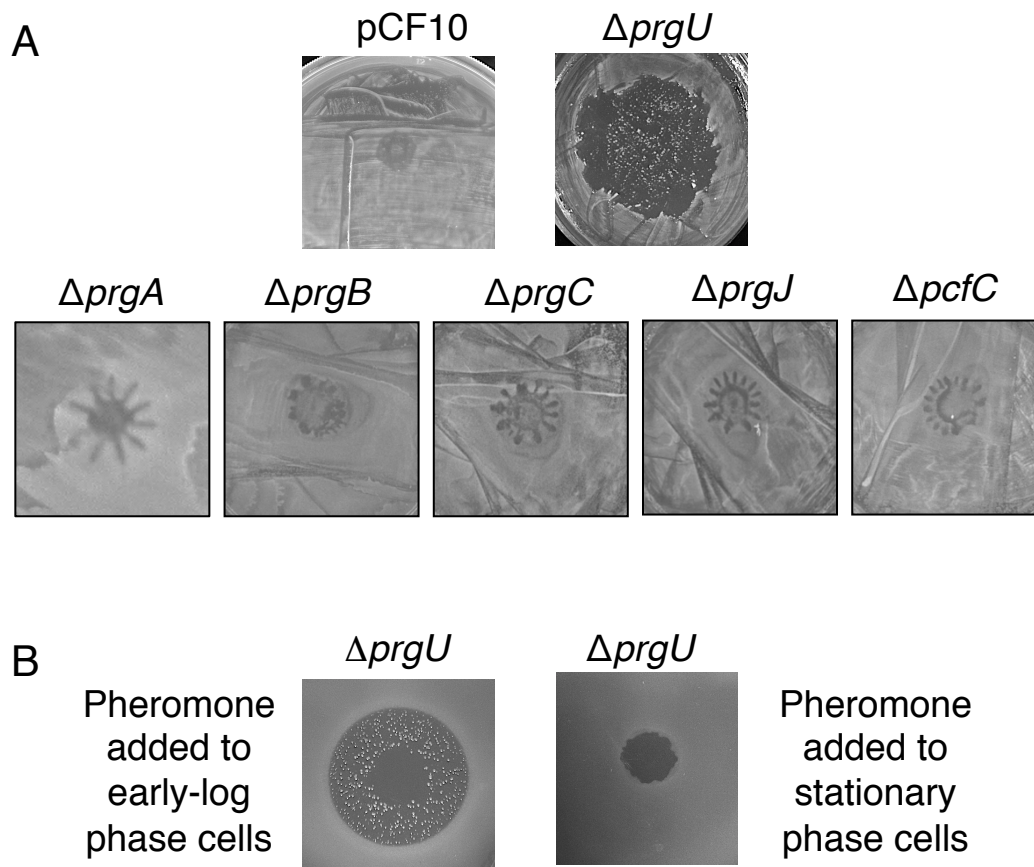

**FIG. S2.** The  $\Delta prgU$  mutant, but not other  $\Delta prg/pcf$  mutant strains displays phormone sensitive growth. A) OG1RF strains carrying pCF10 or pCF10 variants deleted of the genes shown were assayed for growth in the presence of phormone. Overnight cultures were diluted 1:100 in fresh BHI and incubated for 1 h at 37°C in the absence of phormone. Cultures were spread on BHI media, allowed to dry, and cCF10 phormone (10 ng ml<sup>-1</sup>) was added to the center of the plate. Plates were incubated overnight at 37°C and assessed for growth. cCF10 phormone is solubilized in DMSO, which inhibits *E. faecalis* growth and causes small zones of clearance independently of cCF10-induced toxicity. B) Phormone spot assays showing that the  $\Delta prgU$  mutant is growth inhibited only when exposed to phormone at an early log phase of growth.



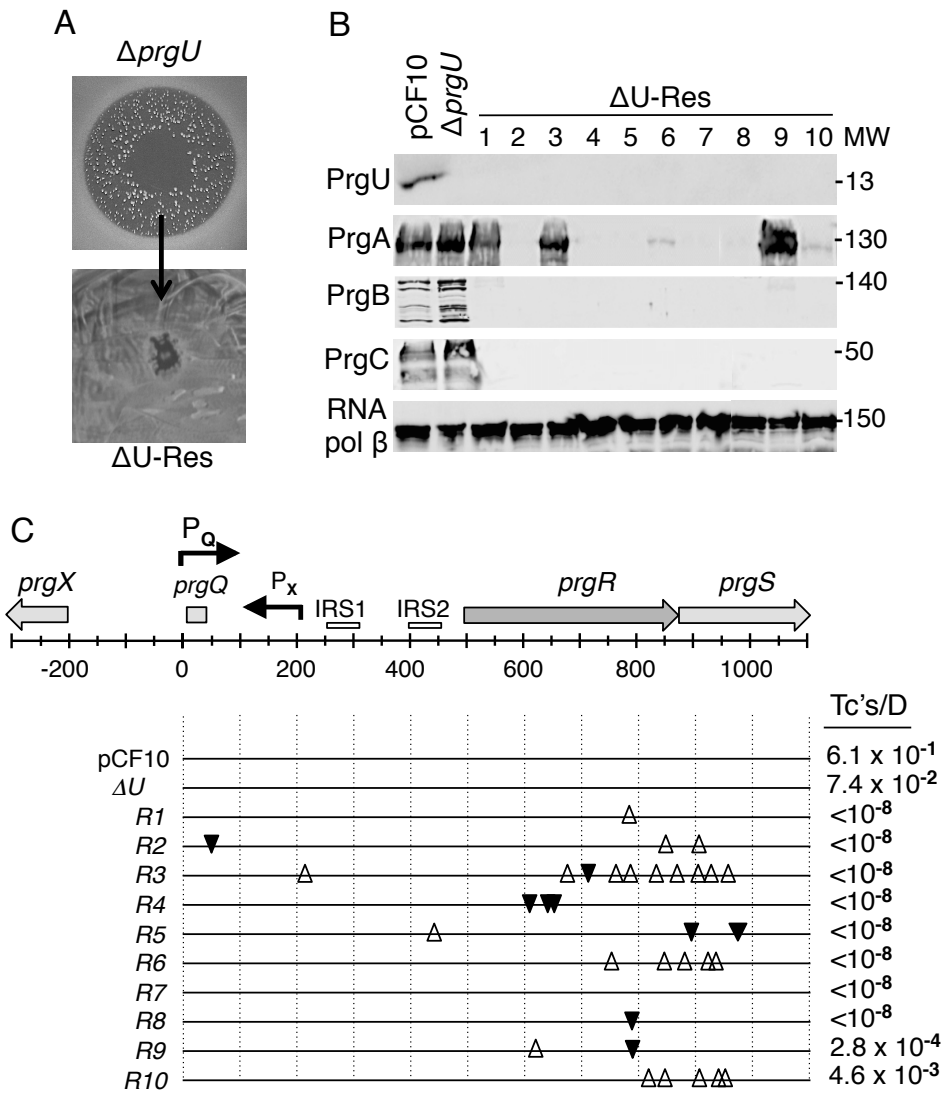

**FIG. S3.**  $\Delta U$ -Res mutations suppress production of PrgB and PrgC adhesins and accumulate mutations in the *prgQ* regulatory region. **A)** Representative pheromone spot assays showing pheromone sensitivity of the  $\Delta prgU$  mutant, OG1RF(pCF10 $\Delta prgU$ ), and pheromone resistance of a  $\Delta U$ -Res mutant strain isolated from within the zone of pheromone inhibition. **B)** Steady-state levels of Prg proteins in 10  $\Delta U$ -Res variants induced for 1 h with cCF10 pheromone ( $10 \text{ ng ml}^{-1}$ ). Strains: OG1RF with pCF10 (WT plasmid),  $\Delta prgU$  (pCF10 $\Delta prgU$ ), or  $\Delta U$ -Res variants R1- R10. Immunoblots were developed with antibodies to the Prg proteins shown or to RNA polymerase  $\beta$  subunit as a loading control. MW, Molecular weights of proteins in kDa are indicated. Protein extracts were loaded on a per-cell equivalent basis. **C)** Upper: Schematic of the *prgQ* regulatory region showing the locations of the  $P_Q$  and  $P_X$  promoters, inverted repeats IRS1 and IRS2 predicted to form stem-loop transcription terminators, and the putative regulatory genes *prgR* and *prgS*. Numbers refer to distances (in base pairs) from the  $P_Q$  promoter start-site. Below: Positions of mutations identified in the 10  $\Delta U$ -Res variants. Symbols: open triangles, single base-pair (bp) deletion mutations; inverted filled triangles, single bp insertion mutations. Right: Transfer frequencies of the  $\Delta U$ -Res variant plasmids in 2 h filter matings presented as the number of transconjugants per donor cell (Tcs/D). Transfer frequencies of donors harboring WT pCF10 and pCF10 $\Delta prgU$  are shown for comparison. Experiments were repeated at least three times in duplicate, and results from a representative experiment are shown.

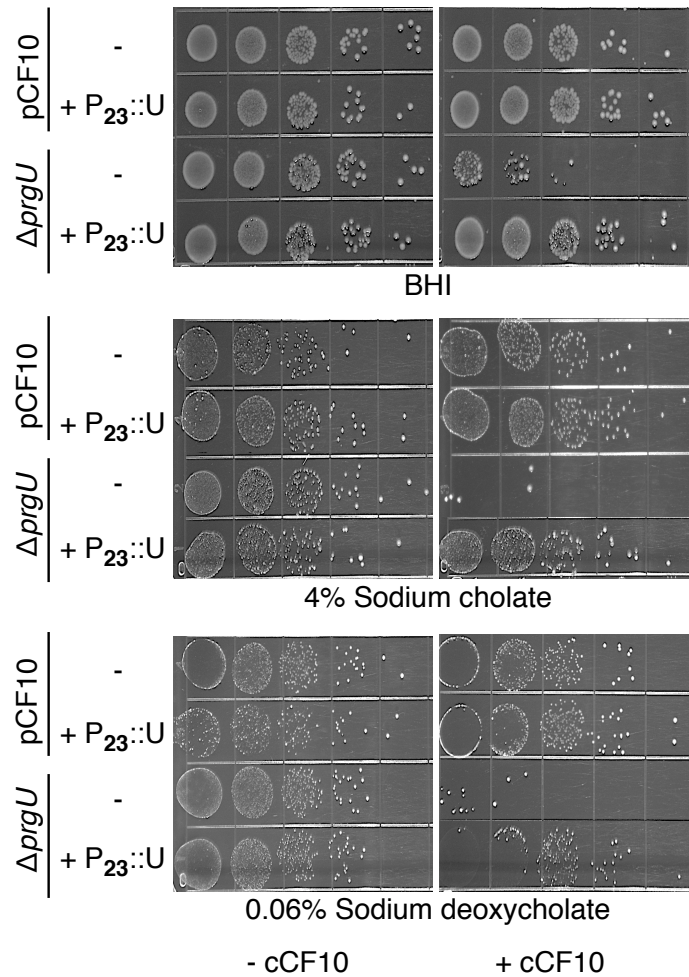

**FIG. S4.** Growth defect of OG1RF( $\rho$ CF10 $\Delta prgU$ ) in the presence of bile salts. Overnight cultures were diluted into fresh BHI medium and cultured to an  $OD_{600}$  of  $\sim 0.1$ . Tenfold serial dilutions were plated on BHI medium with or without cCF10 pheromone ( $2 \text{ ng ml}^{-1}$ ), or these media additionally containing 4 % sodium cholate or 0.06 % sodium deoxycholate. Strains: OG1RF harboring  $\rho$ CF10 or  $\Delta prgU$  ( $\rho$ CF10 $\Delta prgU$ ) alone or together with the  $P_{23}::prgU$  expression plasmid ( $P_{23}::U$ , pMB11).

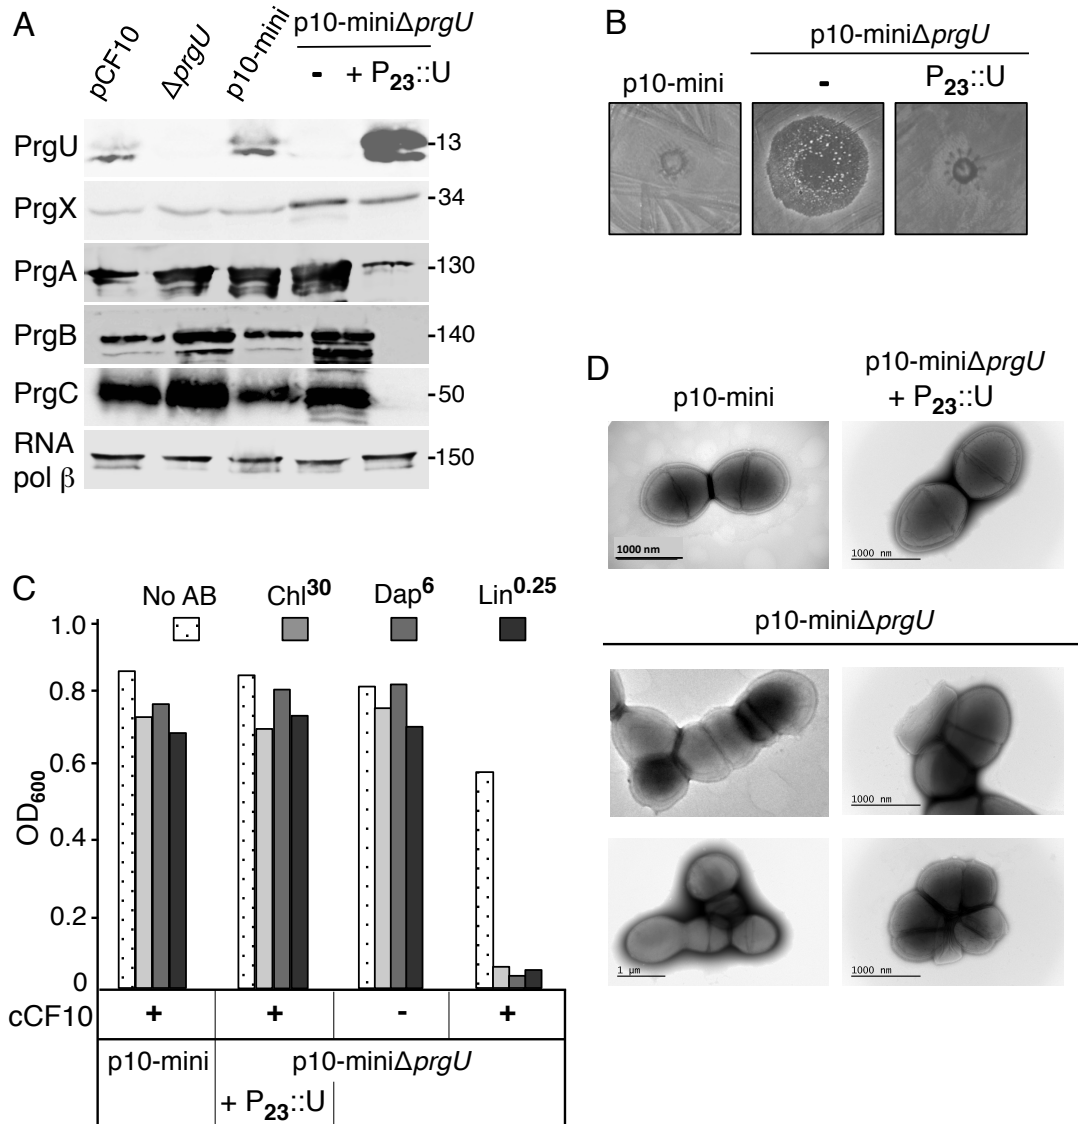

**FIG. S5.** Deletion of *prgU* from a miniaturized pCF10 plasmid confers enhanced production of the Prg surface adhesins and pheromone toxicity. **A)** Steady-state levels of Prg/Pcf proteins in strains induced for 1 h with cCF10 pheromone (10 ng ml<sup>-1</sup>). Strains: OG1RF with **pCF10** (WT plasmid);  **$\Delta prgU$**  (pCF10 $\Delta prgU$ ), **p10-mini** (encodes the *prgQ* regulatory region and the *prgA-C* gene cassette; see Fig. 1A), and **p10-mini $\Delta prgU$**  alone (-) or with the P<sub>23</sub>::*prgU* expression plasmid (P<sub>23</sub>::U; pMB11). Immunoblots were developed with antibodies to the Prg/Pcf proteins shown or to RNA polymerase  $\beta$  subunit as a loading control. Protein sizes (in kilodaltons, kDa) are listed at the right. Protein extracts were loaded on a per-cell equivalent basis. **B)** Pheromone spot assay. OG1RF carrying p10-mini $\Delta prgU$  is inhibited by pheromone; P<sub>23</sub>::*prgU* expression *in trans* restores pheromone insensitive growth. **C)** Pheromone-mediated antibiotic sensitivity of OG1RF(p10-mini $\Delta prgU$ ). Strains: OG1RF with p10-mini or p10-mini $\Delta prgU$  alone or with the P<sub>23</sub>::*prgU* expression plasmid (P<sub>23</sub>::U, pMB11). Strains were inoculated from glycerol stocks into BHI lacking (-) or containing (+) cCF10 and in the absence (No AB) or presence of the antibiotics at final concentrations listed (in  $\mu$ g ml<sup>-1</sup>). Cultures were incubated overnight at 37 °C without shaking and culture densities (OD<sub>600</sub>) were measured. **D)** PrgB overproduction confers severe growth defects. Freshly transformed cells were inoculated in fresh BHI supplemented with pheromone (10 ng ml<sup>-1</sup>) and incubated without shaking for 1 h at 37°C. Cells were processed for imaging as described in the Experimental procedures. Strains: OG1RF with p10-mini or p10-mini $\Delta prgU$  alone or with the P<sub>23</sub>::*prgU* expression plasmid (P<sub>23</sub>::U, pMB11).

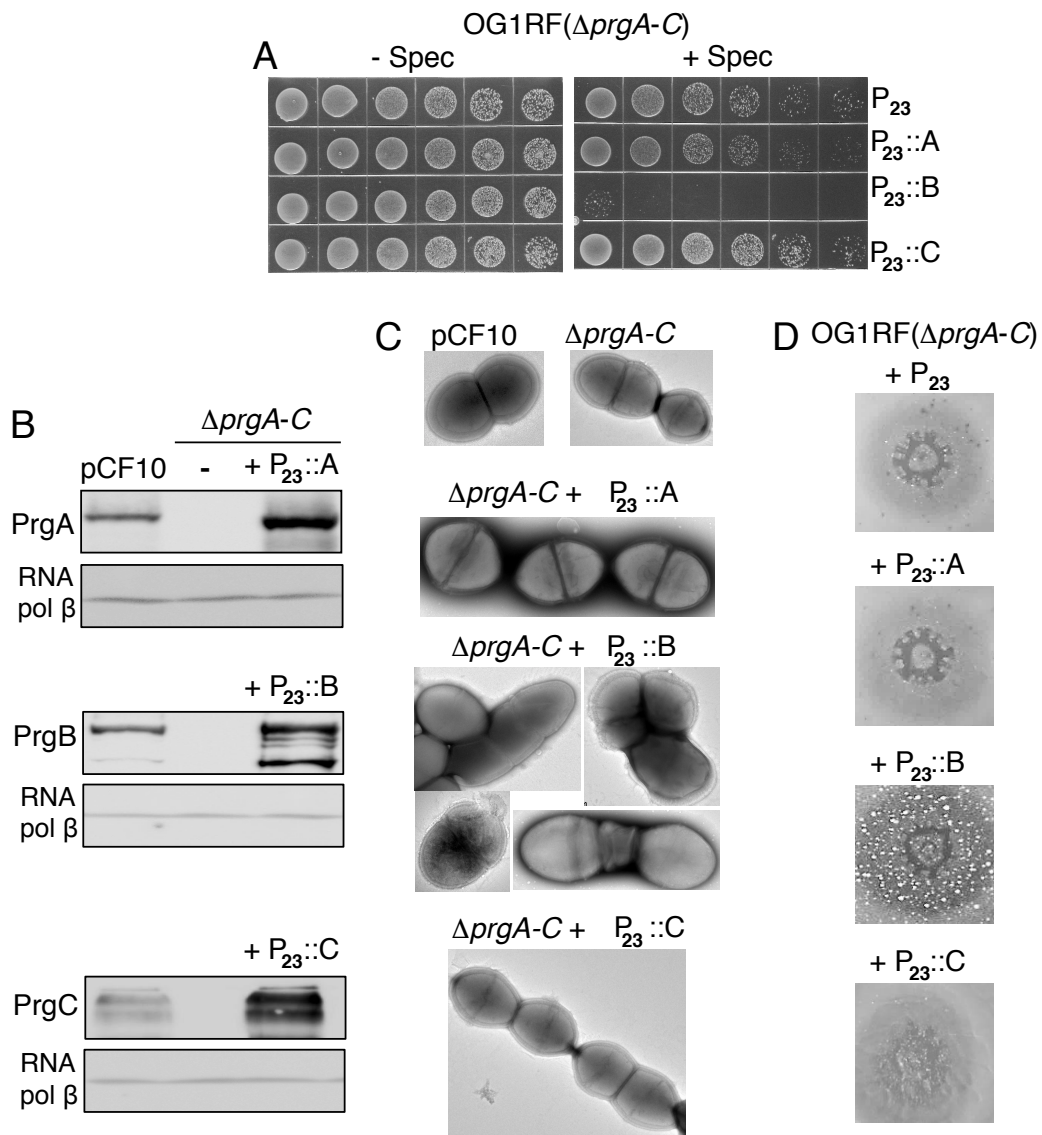

**FIG. S6.** PrgB overproduction confers pheromone toxicity in OG1RF(pCF10 $\Delta$ *prgA-C*) cells. **A)** Plasmid curing assay. Colonies from transformation plates were inoculated into antibiotic-free BHI and incubated without shaking overnight at 37°C. Overnight cultures were then serially diluted and spotted onto BHI agar plates containing or lacking spectinomycin (500  $\mu$ g ml<sup>-1</sup>) to which the P<sub>23</sub> plasmid confers resistance. **B)** Levels of Prg proteins in OG1RF(pCF10 $\Delta$ *prgA-C*) strains engineered to express *prgA*, *prgB* or *prgC* from the P<sub>23</sub> promoter, as monitored by immunostaining with antibodies to PrgA, PrgB, or PrgC. Protein extracts were loaded on a per-cell equivalent basis and RNA polymerase  $\beta$  subunit as a loading control. **C)** PrgB overproduction confers severe growth defects. Freshly transformed cells were inoculated in fresh BHI supplemented with pheromone (10 ng ml<sup>-1</sup>) and incubated without shaking for 1 h at 37°C. Cells were processed for imaging as described in the Experimental procedures. Strains analyzed: OG1RF carrying pCF10 or pCF10 $\Delta$ *prgA-C* alone or with the P<sub>23</sub>::*prgA*, P<sub>23</sub>::*prgB*, or P<sub>23</sub>::*prgC* expression plasmids. **D)** Pheromone spot assay showing that OG1RF strains harboring the pCF10 $\Delta$ *prgA-C* mutant plasmid ( $\Delta$ *prgA-C*) alone or with the P<sub>23</sub>::*prgA* or P<sub>23</sub>::*prgC* expression plasmids exhibit slight pheromone-sensitive growth, while a strain with the P<sub>23</sub>::*prgB* expression plasmid exhibits strong pheromone suppression of growth. Strains: OG1RF( $\Delta$ *prgA-C*) carrying the P<sub>23</sub> vector plasmid (pDL278P<sub>23</sub>), P<sub>23</sub>::*prgA* (pMC001), P<sub>23</sub>::*prgB* (pMC002), or p23::*prgC* (pMB4).

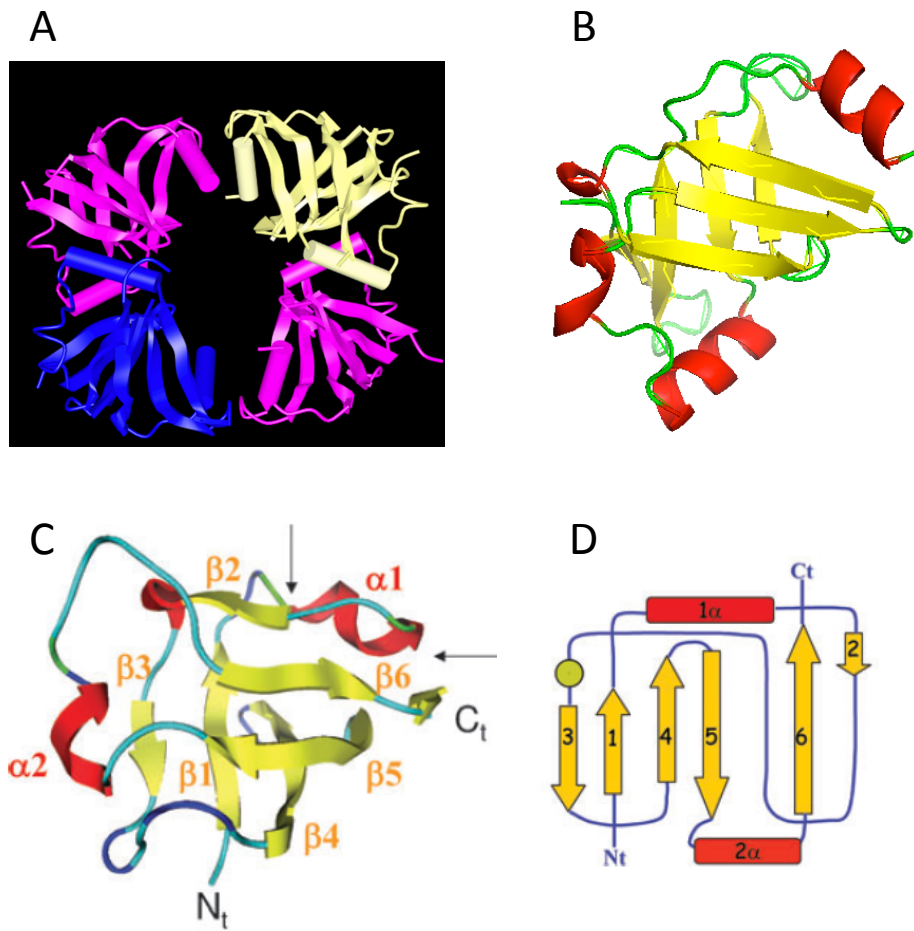

**FIG. S7.** PrgU Structure. **A)** An X-ray structure of a PrgU (V583; EF0046) tetramer. **B)** Ribbon representation of a PrgU monomer, determined by Phyre2 modeling. **C, D)** Ribbon representation and topology diagram of the PUA domain from archaeosine tRNA-guanine transglycosylase (ArcTGT) of *P. horikoshii* (Protein Data Bank code 1J2B) (reprinted with permission from (Perez-Arellano *et al.*, 2007)).

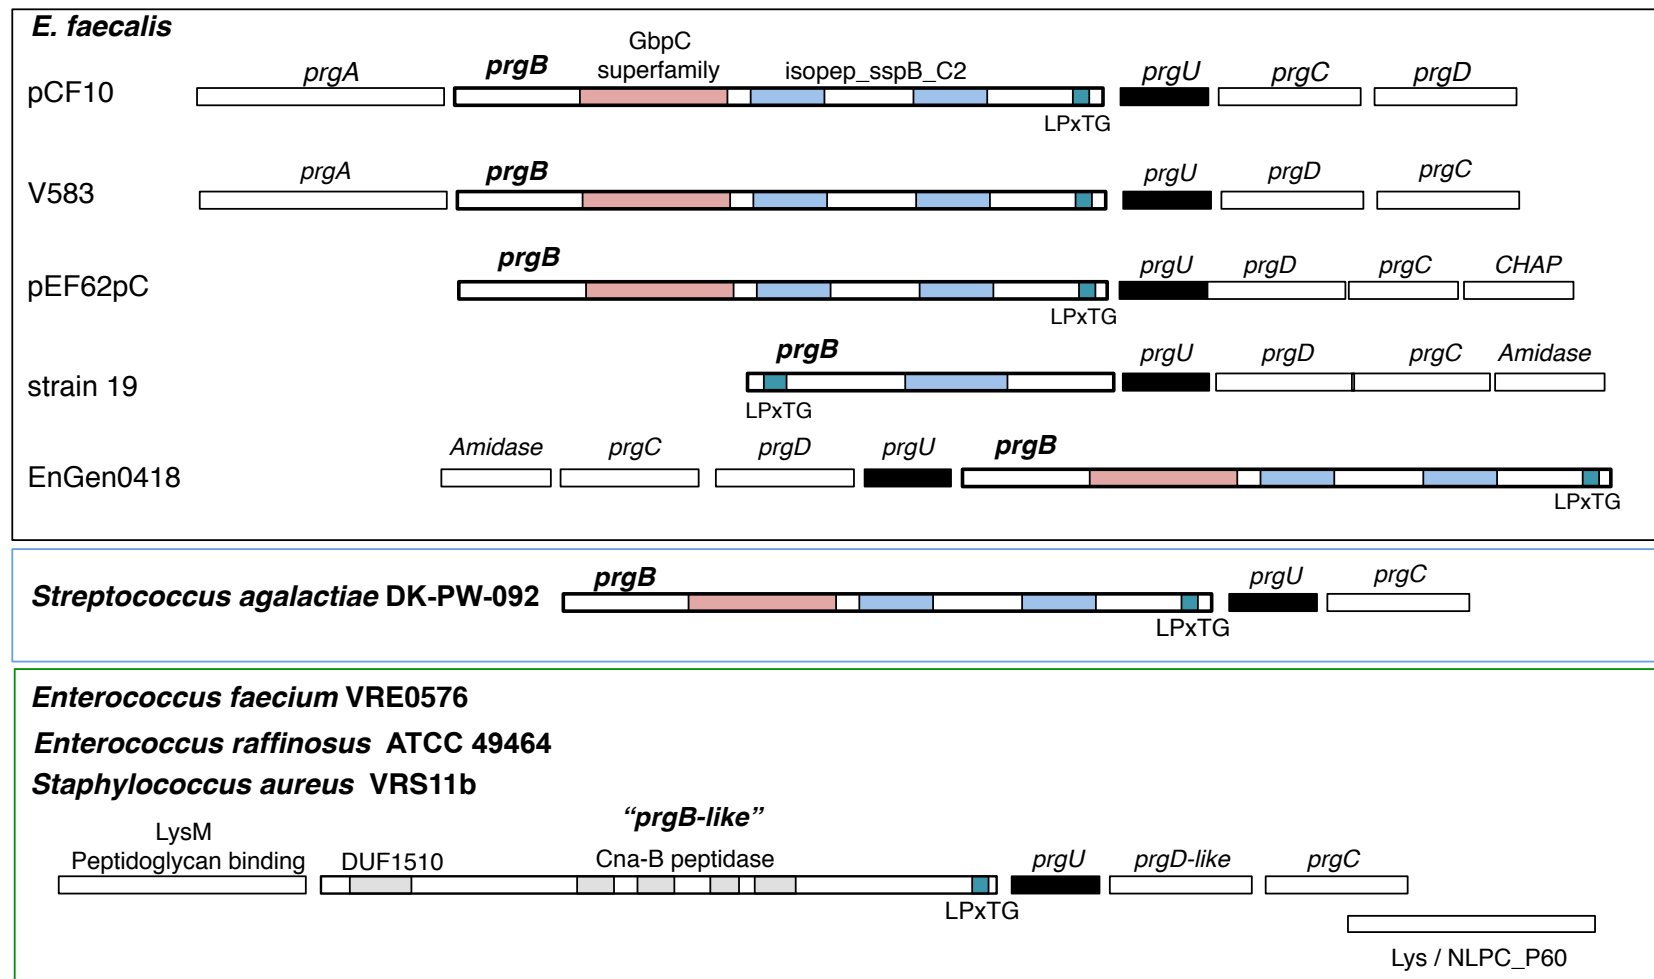

**FIG. S8.** Phylogenetic distributions and genetic linkages of *prgU* and *prgB*-like surface adhesins. *prgU* genes are distributed among *E. faecalis* and other enterococcal species, as well as *Staphylococcus aureus*, invariably linked to *prgB*-like genes and genes encoding other surface adhesins or cell wall modifying proteins. In *E. faecalis* and *S. agalactiae* species, *prgU* genes are linked to *prgB* genes that encode conserved GbpC (Glucan-binding protein C) and isopep\_sspB\_C2 (adhesin isopeptide-forming domain, sspB-C2 type) domains. In *E. faecium*, *E. raffinosus*, and *S. aureus* species, *prgU* genes are instead linked to genes (provisionally designated "prgB-like") that encode adhesins with Cna-B peptidase (Cna protein B-type) domains. Species/strain/plasmid names with genome and *prgU* accession numbers in parantheses: pCF10 (NC\_006827.2, pCF10-17); V583 PAI (NC\_004668.1, EF0486), pTEF1 (NC\_004669.1, EFA0046); pTEF2 (NC\_004671.1; unannotated), pEF62pC (CP002494.1, EF62\_RS15500); strain 19 (JTKW01000029.1, KII47007.1); EnGen0418 (JAHX01000008.1, ETU39552.1); *S. agalactiae* DK-PW-092 (LBKE01000032.1, KLL26985.1); *Enterococcus faecium* VRE0576 (JAAK01000014.1, EZP99904.1); *Enterococcus raffinosus* ATCC 49464 (AJAL01000017.1, EOH75571.1); *Staphylococcus aureus* VRS11b (AHBV01000001.1, EIK36346.1).
